# Supplementary material for: Why COVID-19 symptomatic patients did not seek healthcare service in Bangladesh: Evidence from a cross-sectional study
Source: Research Square preprint supplement (doi:10.21203/rs.3.rs-1157047/v1), 2021-12-15
Supplement: Supplementary file 2 [file be4fd2da82923dd68a87a8bb.docx]

Supplementary Table 1: Socio-demographic distribution and its association with respondent’s HSB during COVID-19

| **Variables** | | **n (%)** | **Taking Medication at Home** | | | **In Hospital** | | | **Doctors chamber** | | | **Over phone advice from personal network** | | | **Over phone from govt. hotline** | | | **Nearby drug store** | | | **Got medication from own experience** | | | **Taken no medicine** | | |
| --- | --- | --- | --- | --- | --- | --- | --- | --- | --- | --- | --- | --- | --- | --- | --- | --- | --- | --- | --- | --- | --- | --- | --- | --- | --- | --- |
| Yes n(%) | No n(%) | p-value | Yes n(%) | No n(%) | p-value | Yes n(%) | No n(%) | p-value | Yes n(%) | No n(%) | p-value | Yes n(%) | No n(%) | p-value | Yes n(%) | No n(%) | p-value | Yes n(%) | No n(%) | p-value | Yes n(%) | No n(%) | p-value |
| **Age** | 18 to <30 | 295(75.6) | 197(66.8) | 98(33.2) | .205 | 1(.3) | 294(99.7) | 0.85 | 12(4.1) | 283(95.9) | 0.34 | 106(35.9) | 189(64.1) | 0.264 | 14(4.7) | 281(95.3) | 0.252 | 37(12.5) | 258(87.5) | 0.133 | 112(38) | 18362() | 0.426 | 33(11.2) | 262(88.8) | 0.85 |
| 30 to <40 | 69(17.7%) | 53(76.8) | 16(23.2) |  | 0(0) | 69(100) |  | 1(1.4) | 68(98.6) |  | 31(44.9) | 38(55.1) |  | 1(1.4) | 68(98.6) |  | 4(5.8) | 65(94.2) |  | 21(30.4) | 48(69.6) |  | 8(11.6) | 61(88.4) |  |
| 40 and over | 26(6.7%) | 16(61.5) | 10 |  | 0(0) | 26(100) |  | 2(7.7) | 24(92.3) |  | 12(46.2) | 14(53.8) |  | 0(0) | 26(100) |  | 1(3.8) | 25(96.2) |  | 11(42.3) | 15(57.7) |  | 2(7.7) | 24(92.3) |  |
| **Sex** | Female | 80(20.5) | 60(75) | 20(25) | .140 | 0(0) | 80 | 0.61 | 1(1.3) | 79(98.7) | 0.18 | 41(51.3) | 39(48.8) | **0.007** | 6(7.5) | 74(92.5) | 0.06 | 10(12.5) | 70(87.5) | 0.58 | 19(23.8) | 61(76.3) | **0.01** | 8(10) | 72(90) | 0.74 |
| Male | 310(79.5) | 206(66.5) | 104(33.5) |  | 1(.3) | 309(99.7) |  | 14(4.5) | 296(95.5) |  | 108(34.8) | 202(65.2) |  | 9(2.9) | 301(97.1) |  | 32(10.3) | 278(89.7) |  | 125(40.3) | 185 |  | 35(11.3) | 275 |  |
| **Dwelling** | Urban | 313(80.3) | 224(71.6) | 89(28.4) | **.004** | 1(.3) | 312(99.7) | 0.62 | 11(3.5) | 302(96.5) | 0.49 | 131(41.9) | 182(58.1) | **0.003** | 14(4.5) | 299(95.5) | 0.19 | 27(8.6) | 286(91.4) | **0.01** | 105(33.5) | 208(66.5) | **0.01** | 33(10.5) | 280(89.5) | 0.54 |
| Rural | 77(19.7) | 42(54.5) | 35 |  | 0(0) | 77(100) |  | 4(5.2) | 73(94.8) |  | 18(23.4) | 59(76.6) |  | 1(1.3) | 76(98.7) |  | 15(19.5) | 62 |  | 39(50.6) | 38 |  | 10(13) | 67(87) |  |
| **Smoking** | No | 348(89.2) | 233(67) | 115(33) | .127 | 1(.3) | 347(99.7) | 0.73 | 12(3.4) | 336(96.6) | 0.24 | 136(39.1) | 212(60.9) | 0.31 | 10(2.9) | 338(97.1) | 0.004 | 40(11.5) | 308(88.5) | 0.18 | 128(36.8) | 220(63.2) | 0.87 | 41(11.8) | 307(88.2) | 0.17 |
| Yes | 42(10.8) | 33(78.6) | 9(21.4) |  | 0(0) | 42(100) |  | 3(7.1) | 39(92.9) |  | 13(31) | 29(69) |  | 5(11.9) | 37(88.1) |  | 2(4.8) | 40(95.2) |  | 16(38.1) | 26(61.9) |  | 2(4.8) | 40(95.2) |  |
| **Education** | Up-to 12 grade | 114(29.2) | 73(64) | 41(36) | 0.49 | 0(0) | 114(100) | 0.54 | 7(6.1) | 107(93.9) | 0.13 | 42(36.8) | 72(63.2) | 0.58 | 6(5.3) | 108(94.7) | 0.07 | 19(16.7) | 95(83.7) | **0.02** | 43(37.7) | 71(62.3) | 0.3 | 15(13.2) | 99(86.8) | 0.69 |
| Bachelor | 175(44.9) | 121(69.1) | 54(30.9) |  | 1(.6) | 174(99.4) |  | 3(1.7) | 172(98.3) |  | 64(36.6) | 111(63.4) |  | 9(5.1) | 166(94.9) |  | 18(10.3) | 157(89.7) |  | 70(40) | 105(60) |  | 18(10.3) | 157(89.7) |  |
| Masters and PhD. | 101(25.9) | 72(71.3) | 29(28.7) |  | 0(0) | 101(100) |  | 5(5) | 96(95) |  | 43(42.6) | 58(57.4) |  | 0(0) | 101(100) |  | 5(5) | 96(95) |  | 31(30.7) | 70(63.3) |  | 10(9.9) | 91(90.1) |  |
| **Profession** | Jobless/Housewife/Retired | 51(13.1) | 33(64.7) | 18(35.3) | 0.56 | 1(2) | 50(98) | 0.08 | 1(2) | 50(98) | 0.9 | 14(27.5) | 37(72.5) | 0.39 | 1(2) | 50(98) | 0.62 | 2(3.9) | 49(96.1) | 0.17 | 15(29.4) | 36(70.6) | 0.09 | 8(15.7) | 43(84.3) | 0.47 |
| Student | 192(49.2) | 133(69.3) | 59(30.7) |  | 0(0) | 1929100) |  | 8(4.2) | 184(95.8) |  | 75(39.1) | 117(60.9) |  | 9(4.7) | 183(95.3) |  | 25(13) | 167 |  | 69(35.9) | 123(64.1) |  | 19(9.9) | 173(90.1) |  |
| Business | 23(5.9) | 13(56.3) | 10(43.5) |  | 0(0) | 23(100) |  | 1(4.3) | 106(95.5) |  | 9(39.1) | 14(60.9) |  | 0(0) | 23(100) |  | 4(17.4) | 19(82.6) |  | 5(21.7) | 18(78.3) |  | 4(17.4) | 19(82.6) |  |
| Service | 124(31.8) | 87(70.2) | 37(29.8) |  | 0(0) | 124(100) |  | 5(4) | 106(95.5) |  | 51(41.1) | 73(58.9) |  | 5(4) | 119(96) |  | 11(8.9) | 113(91.1) |  | 55(44.4) | 69 |  | 12 | 112 |  |
| **Income** | <15k | 73(18.7) | 44(60.3) | 29(39.7) | 0.3 | 0(0) | 73(100) | 0.47 | 3(4.1) | 106(95.5) | 0.95 | 24(32.9) | 49(67.1) | **0.005** | 1(1.4) | 72(98.6) | 0.29 | 12(16.4) | 61(83.6) | **0.01** | 31(42.5) | 42(57.5) | **0.01** | 12(16.4) | 61(83.6) | 0.2 |
| 15k -25k | 100(25.6) | 66(66) | 34(34) |  | 0(0) | 100(100) |  | 3(3) | 106(95.5) |  | 23(23) | 77(77) |  | 4(4) | 96(96) |  | 17(18) | 83(83) |  | 49(49) | 51(51) |  | 8(8) | 92(92) |  |
| 25k - 50k | 106(27.2) | 76(71.7) | 30(28.3) |  | 0(0) | 106(100) |  | 4(3.8) | 106(95.5) |  | 51(48.1) | 55(51.9) |  | 7(6.6) | 99(93.4) |  | 8(7.5) | 98(92.5) |  | 29(27.4) | 77(71.6) |  | 14(13.2) | 92(86.8) |  |
| 50k and above | 111(28.5) | 80(72.1) | 31(27.9) |  | 1(.3) | 110(99.7) |  | 5(4.5) | 106(95.5) |  | 51(45.9) | 60(54.1) |  | 3(2.7) | 108(97.3) |  | 5(4.5) | 106(95.5) |  | 35(31.5) | 76(68.5) |  | 9(8.1) | 102(91.9) |  |

Supplementary Table 2: Socio-demographic distribution and its association with the reasons for not undergoing COVID-19 test

| **Variables** | | **n (%)** | **Time consuming and complex process** | | | **Inadequate facilities for testing** | | | **Fear of social stigma** | | | **Fear of forced quarantine of tested positive** | | | **Risk of getting infected from test centre** | | | | **If infected nothing will happen** | | | |
| --- | --- | --- | --- | --- | --- | --- | --- | --- | --- | --- | --- | --- | --- | --- | --- | --- | --- | --- | --- | --- | --- | --- |
| Yes n(%) | No n(%) | p-value | Yes n(%) | No n(%) | p-value | Yes n(%) | No n(%) | p-value | Yes n(%) | No n(%) | p-value | Yes n(%) | No n(%) | p-value | Yes n(%) | | No n(%) | p-value |
| **Age** | 18 to <30 | 295(75.6) | 139(47.1) | 156(52.9) |  | 137(46.4) | 158(53.6) |  | 55(18.6) | 240(81.4) |  | 14(4.7) | 281(95.3) |  | 136(46.1) | 159(53.9) |  | 58(19.7) | | 237(80.3) |  |
| 30 to <40 | 69(17.7%) | 45(65.2) | 24(34.8) | **0.002** | 36(52.2) | 33(47.8) | 0.57 | 9(13) | 60(87) | **0.018** | 3(4.3) | 66(95.7) | 0.306 | 32(46.4) | 37(53.6) | 0.748 | 12(17.4) | | 57(82.6) | 0.311 |
| 40 and over | 26(6.7%) | 19(73.1) | 7(26.9) |  | 14(53.8) | 12(46.2) |  | 10(38.5) | 16(61.5) |  | 3(11.5) | 23(88.5) |  | 10(38.5) | 16(61.5) |  | 2(7.7) | | 24(92.3) |  |
| **Sex** | Female | 80(20.5) | 45(56.3) | 35(43.8) | 0.39 | 30(37.5) | 50(62.5) | 0.36 | 13(16.3) | 67(83.8) | 0.49 | 3(3.8) | 77(96.3) | 0.53 | 44(55) | 36(45) | **0.06** | 6(7.5) | | 74(92.5) | **0.005** |
| Male | 310(79.5) | 158(51) | 152(49) |  | 157(50.6) | 153(49.4) |  | 61(19.7) | 249(80.3) |  | 17(5.5) | 293(94.5) |  | 134(43.2) | 176(56.8) |  | 66(21.3) | | 244(78.7) |  |
| **Dwelling** | Urban | 313(80.3) | 167(53.4) | 146(46.6) | 0.29 | 157(50.2) | 156(49.8) | **0.08** | 57(18.2) | 256(81.8) | 0.44 | 14(4.5) | 299(95.5) | 0.24 | 156(49.8) | 157(50.2) | **0.001** | 50(16) | | 263(84) | **0.01** |
| Rural | 77(19.7) | 36(46.8) | 41(53.2) |  | 30(39) | 47(61) |  | 17(22.1) | 60(77.9) |  | 6(7.8) | 71(92.2) |  | 22(28.6) | 55(71.4) |  | 22(28.6) | | 55(71.4) |  |
| **Smoking** | No | 348(89.2) | 185(53.2) | 163(46.8) |  | 167(48) | 181(52) |  | 69(19.8) | 279(80.2) |  | 17(4.9) | 331(95.1) |  | 160(46) | 188(54) |  | 66(19) | | 282(81) |  |
| Yes | 42(10.8) | 18(42.9) | 24(57.1) | 0.21 | 20(47.6) | 22(52.4) | 0.96 | 5(11.9) | 37(88.1) | 0.22 | 3(7.1) | 39(92.9) | 0.53 | 18(42.9) | 24(57.1) | 0.7 | 6(14.3) | | 36 (85.7) | 0.46 |
| **Education** | Up-to 12 grade | 114(29.2) | 61(53.5) | 53(46.5) |  | 48(42.1) | 66(57.9) |  | 27(23.7) | 87(76.3) |  | 8(7) | 106(93) |  | 53(46.5) | 61(53.5) |  | 29(25.4) | | 85(74.6) |  |
| Bachelor | 175(44.9) | 81(46.3) | 94(53.7) | **0.07** | 82(46.9) | 93(53.1) | 0.1 | 26(14.9) | 149(35.1) | 0.15 | 8(4.6) | 167(95.4) | 0.54 | 83(47.4) | 92(52.6) | 0.63 | 32(18.3) | | 143(81.7) | 0.23 |
| Masters and PhD. | 101(25.9) | 61(60.4) | 40(39.6) |  | 57(56.4) | 44(43.6) |  | 21(20.8) | 80(79.2) |  | 4(4) | 97(96) |  | 42(41.6) | 59(58.4) |  | 11(10.9) | | 90(89.1) |  |
| **Profession** | Jobless/Housewife/Retired | 51(13.1) | 28(54.9) | 23(45.1) | **0.03** | 23(45.1) | 28(54.9) | **0.01** | 18(35.3) | 33(64.7) | **0.01** | 3(5.9) | 48(94.1) | 0.27 | 17(33.3) | 34(66.7) | 0.16 | 11(21.6) | | 40(78.4) | 0.83 |
| Student | 192(49.2) | 86(44.8) | 106(55.2) |  | 79(41.1) | 113(58.9) |  | 31(16.1) | 161(83.) |  | 7(3.6) | 185(96.4) |  | 92(47.9) | 100(52.1) |  | 37(19.3) | | 155(80.7) |  |
| Business | 23(5.9) | 13(56.5) | 10(43.5) |  | 11(47.8) | 12(52.2) |  | 6(26.1) | 17(83.9) |  | 3(13) | 20(87) |  | 8(34.8) | 15(65.2) |  | 4(17.4) | | 19(82.6) |  |
| Service | 124(31.8) | 76(61.3) | 48(38.7) |  | 74(59.9) | 50(40.3) |  | 19(15.3) | 105(84.7) |  | 7(5.6) | 117(94.4) |  | 61(49.2) | 63(50.8) |  | 20(16.1) | | 104(83.9) |  |
| **Income** | <15k | 73(18.7) | 32(43.8) | 41(56.2) | 0.35 | 30(41.1) | 43(58.9) | 0.44 | 18(24.7) | 55(75.3) | 0.46 | 4(5.5) | 69(94.5) | 0.13 | 25(34.2) | 48(65.8) | 0.14 | 2027.4) | | 53(72.6) | **0.05** |
| 15k -25k | 100(25.6) | 52(52) | 48(48) |  | 50(50) | 50(50) |  | 18(21) | 81(82) |  | 9(9) | 91(91) |  | 45(45) | 55(55) |  | 20(20) | | 80(80) |  |
| 25k - 50k | 106(27.2) | 61(57.5) | 45(42.5) |  | 56(52.8) | 50(47.2) |  | 21(19.8) | 85(80.2) |  | 5(4.7) | 101(95.3) |  | 51(48.1) | 55(51.9) |  | 12(11.3) | | 94(88.7) |  |
| 50k and above | 111(28.5) | 58(52.3) | 53(47.7) |  | 51(45.9) | 60(54.1) |  | 17(15.3) | 94(84.7) |  | 2(1.8) | 109(95.3) |  | 57(51.4) | 54(48.6) |  | 20(18) | | 91(82) |  |
